# Supplementary material for: Vehicle-based in-situ observations of the water vapor isotopic composition across China: spatial and seasonal distributions and controls
Source: Copernicus journal article supplement (doi:10.5194/acp-2022-223), 2022-05-04
Supplement: Supplementary file 1 [file acp-2022-223-supplement.zip]

Archive with 8 entries (8 files):
- Fig.S1.pdf
- Fig.S2.pdf
- Fig.S3.pdf
- Fig.S4.pdf
- Fig.S5.pdf
- Fig.S6.pdf
- Fig.SIII-1.pdf
- water vapor-China-Supplementary Information-Figures-Tables-Text.pdf
