# Supplementary figures and images for: Vehicle-based in-situ observations of the water vapor isotopic composition across China: spatial and seasonal distributions and controls
Source: Copernicus journal article supplement (doi:10.5194/acp-2022-223), 2022-05-04

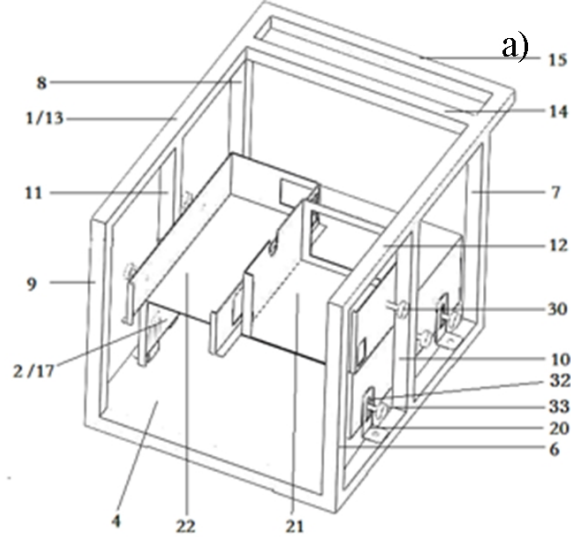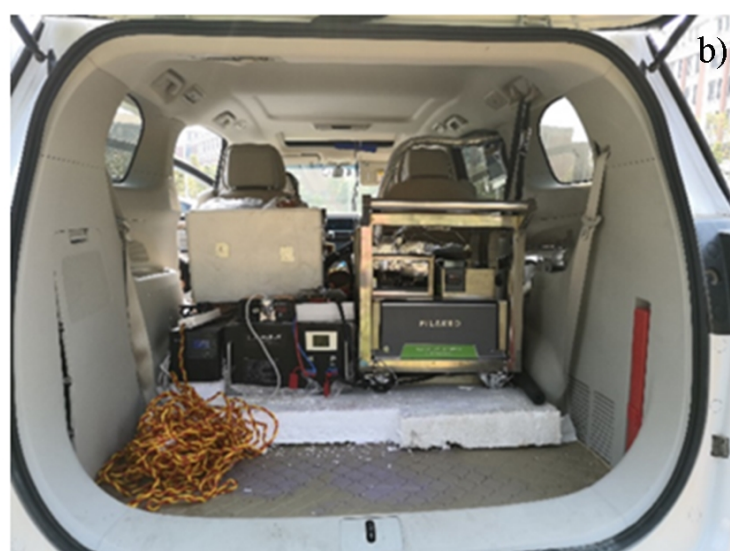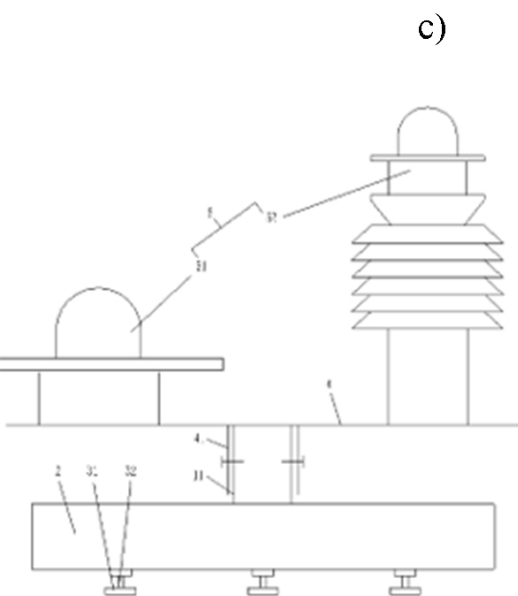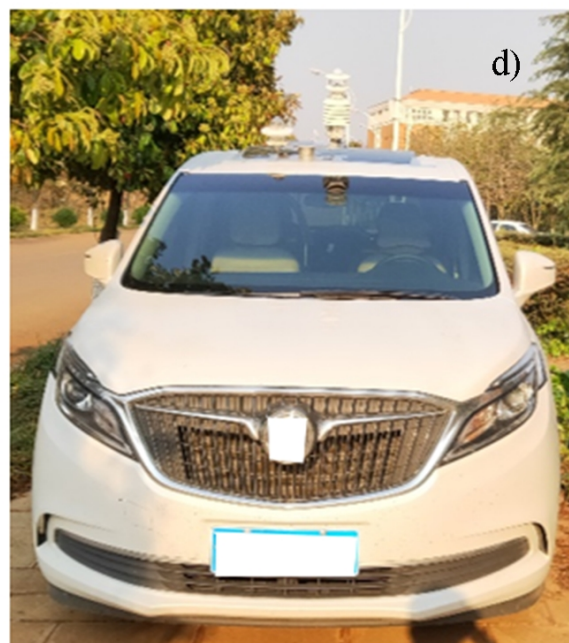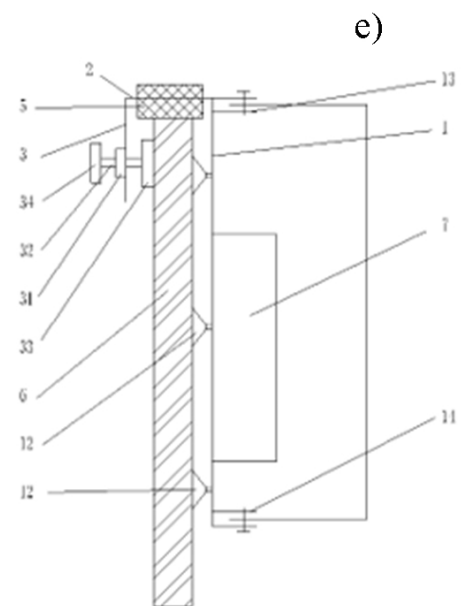

Supplement: Supplementary file 1 [file acp-2022-223-supplement.zip › Fig.S1.pdf]

Pre-monsoon period

Monsoon period

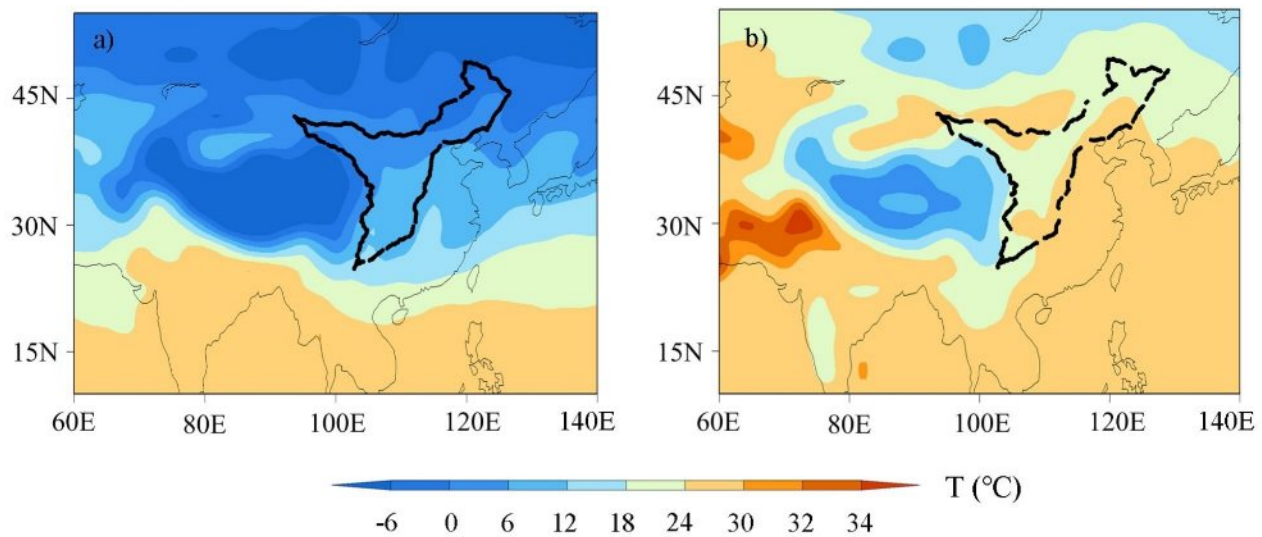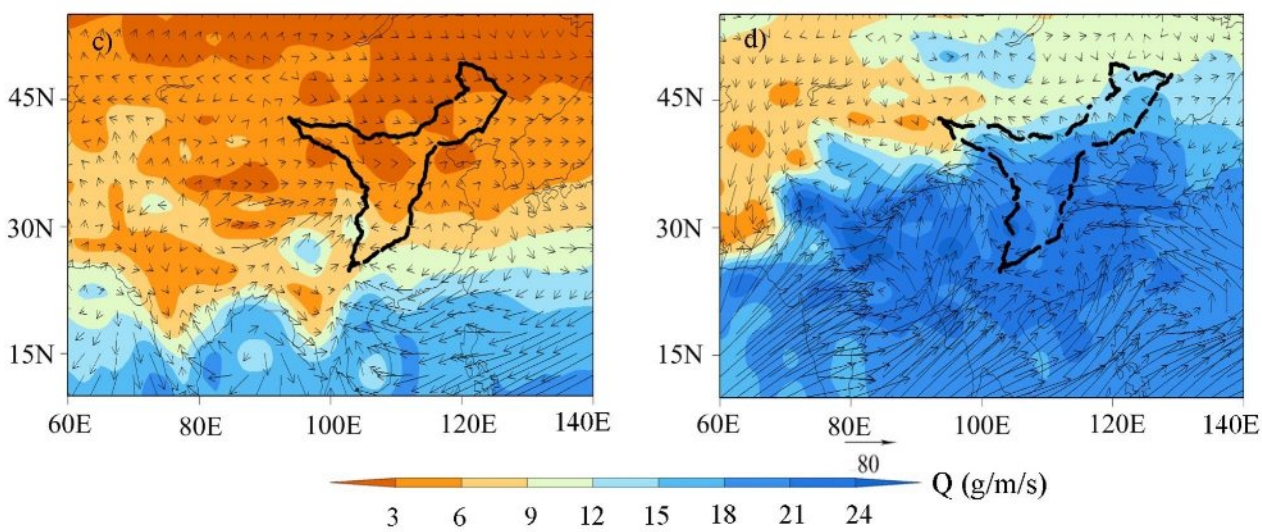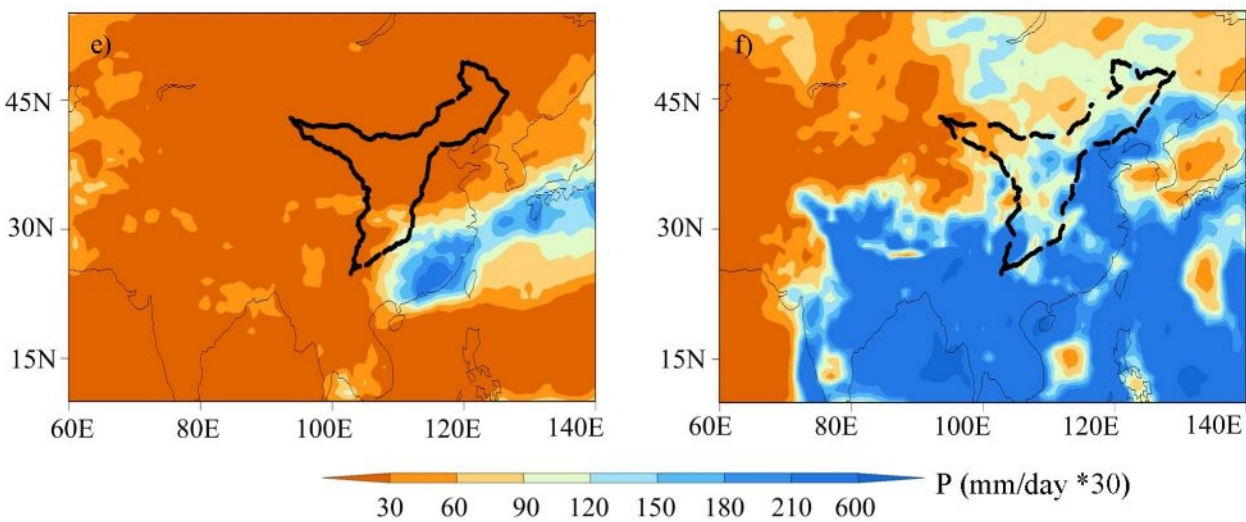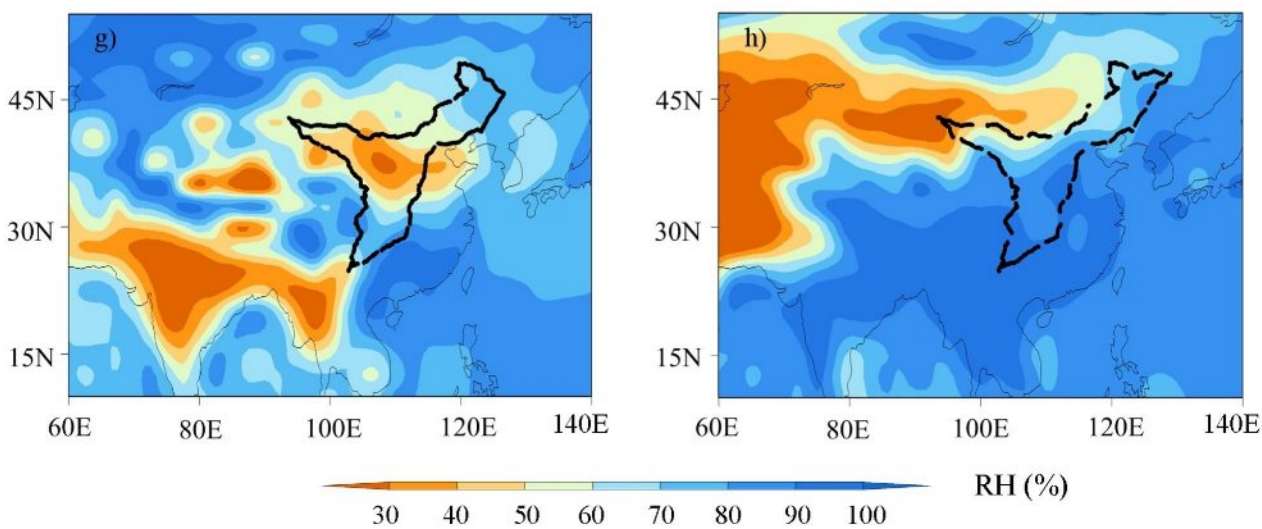

Supplement: Supplementary file 1 [file acp-2022-223-supplement.zip › Fig.S2.pdf]

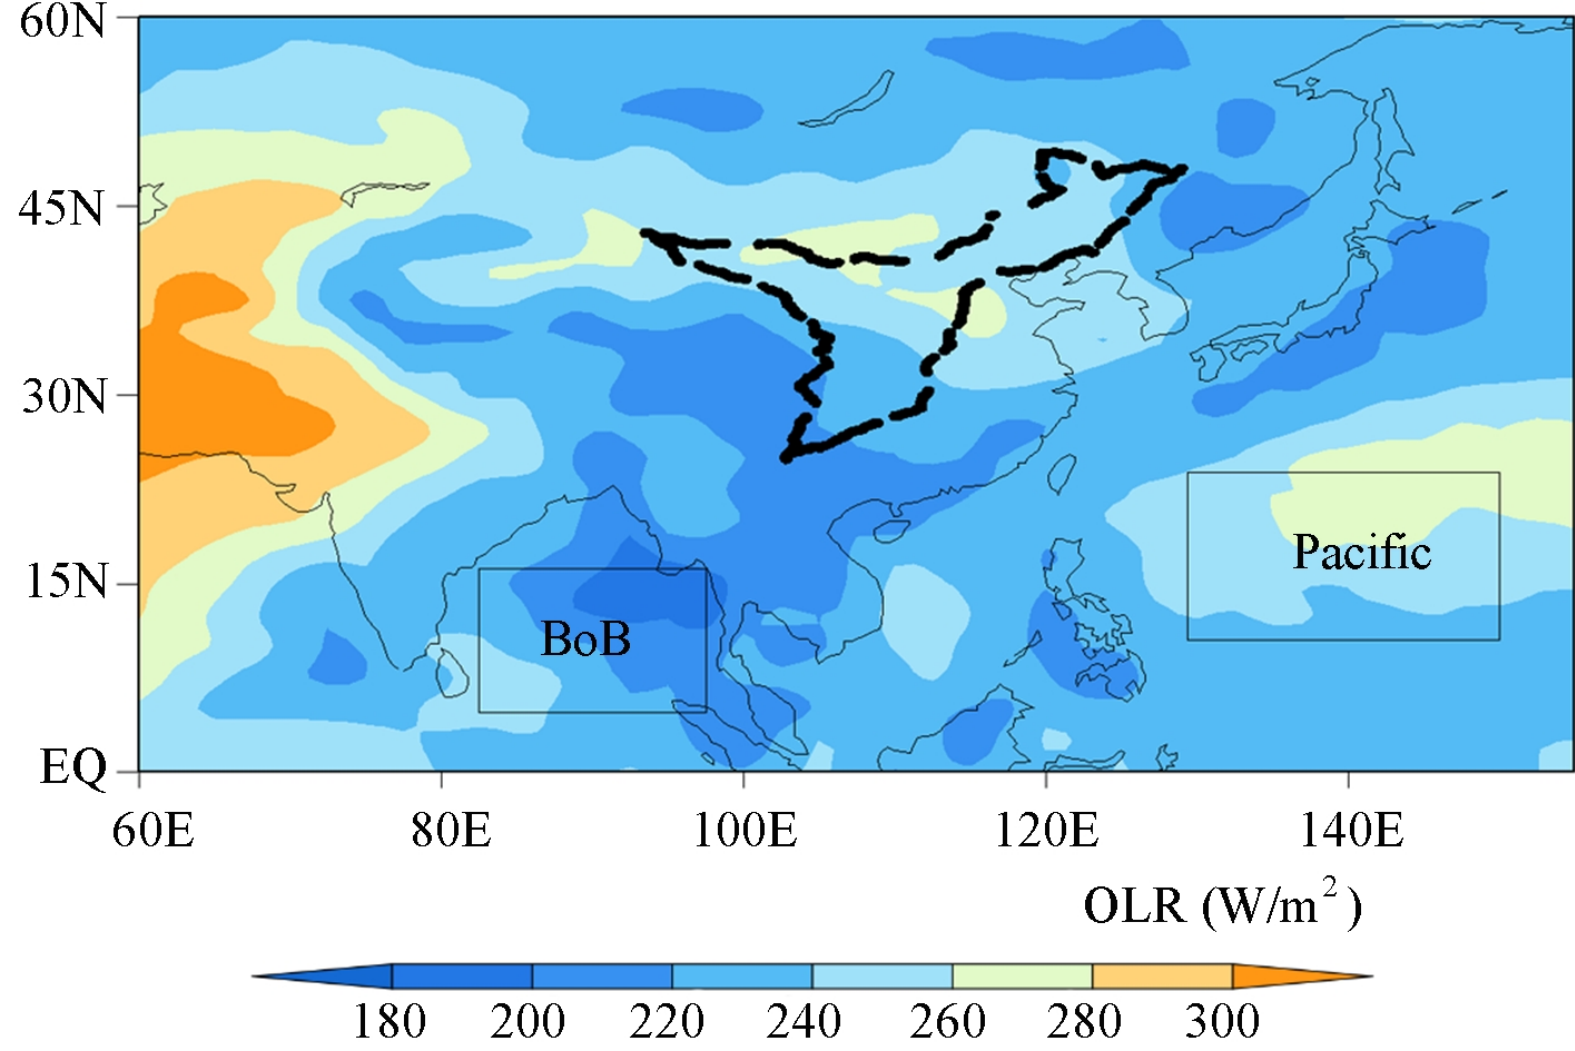

Supplement: Supplementary file 1 [file acp-2022-223-supplement.zip › Fig.S3.pdf]

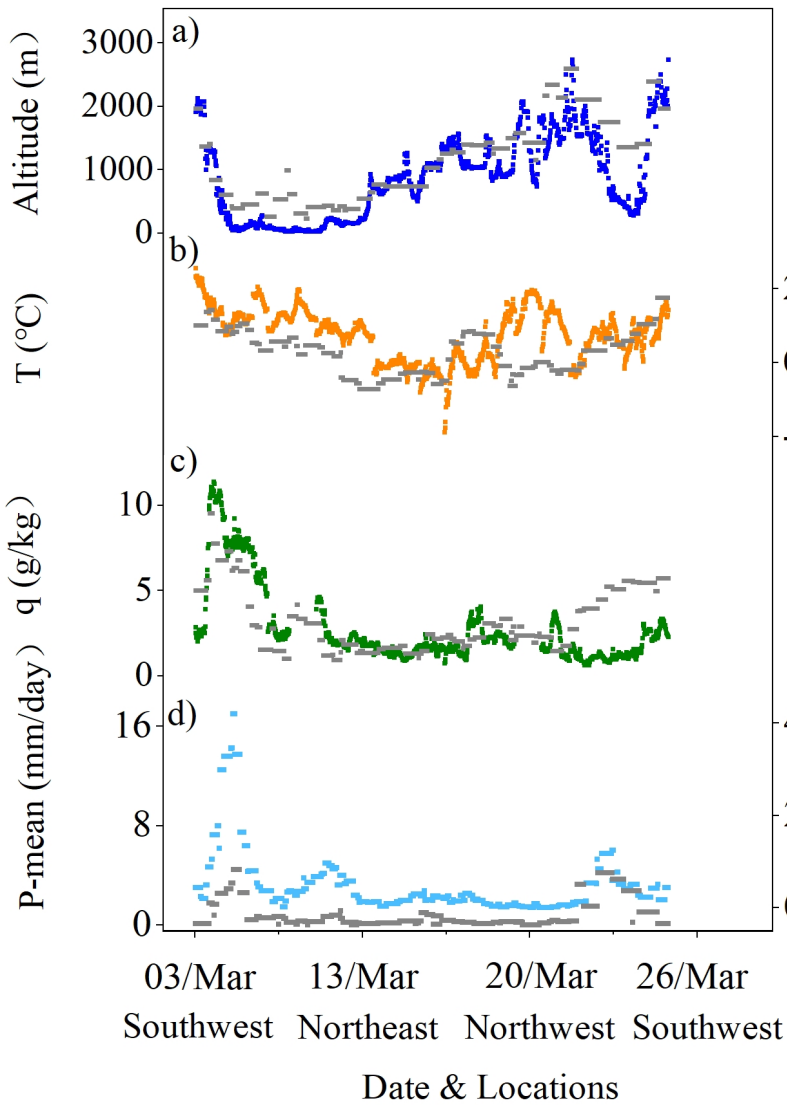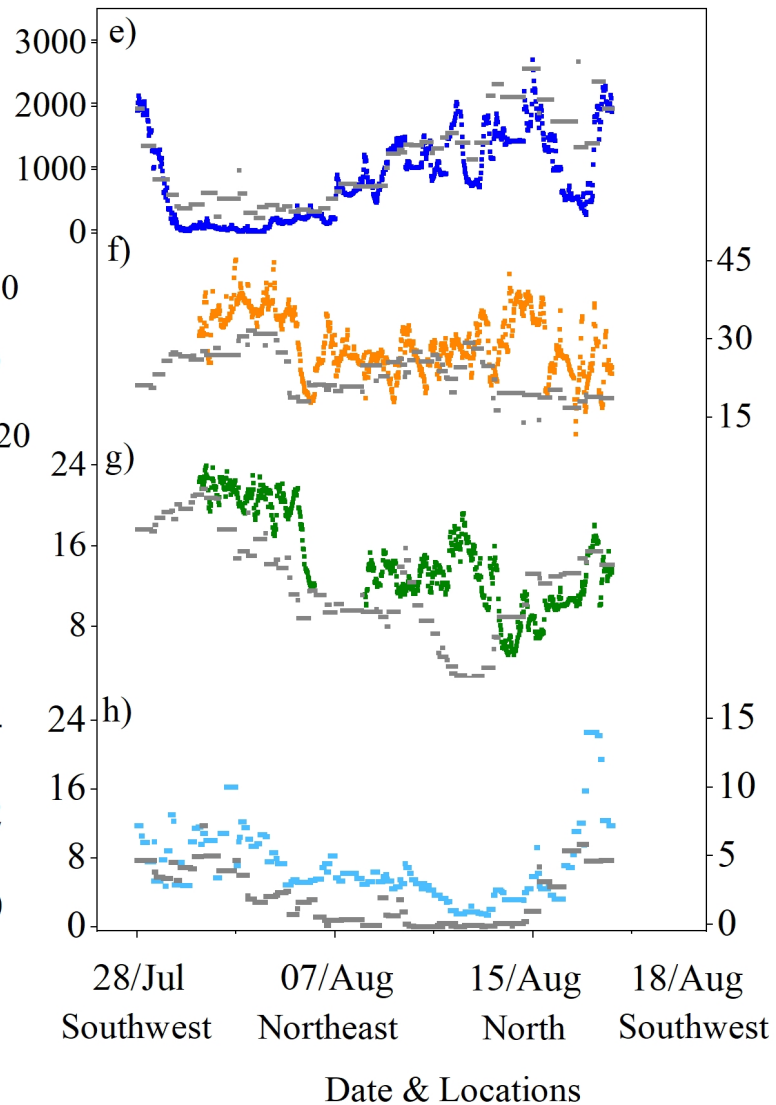

Supplement: Supplementary file 1 [file acp-2022-223-supplement.zip › Fig.S4.pdf]

Pre-monsoon period

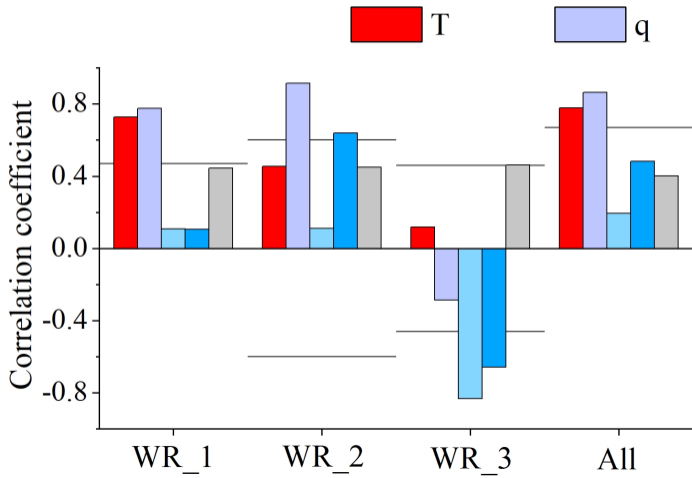

Monsoon period

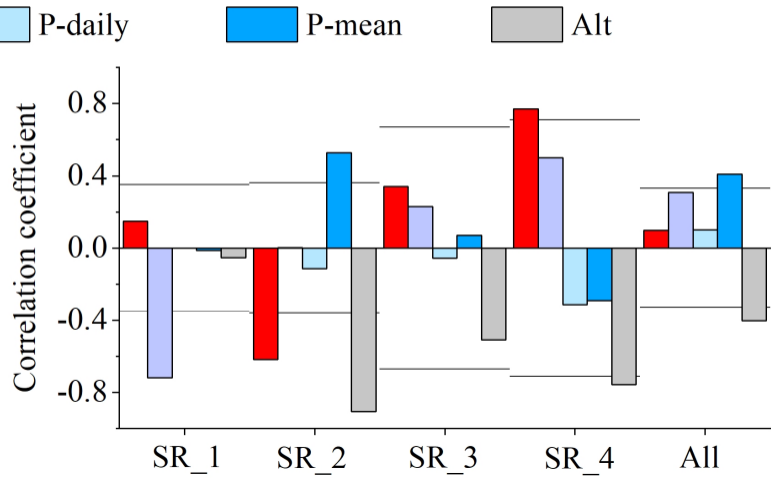

Supplement: Supplementary file 1 [file acp-2022-223-supplement.zip › Fig.S5.pdf]

a) Pre-monsoon period

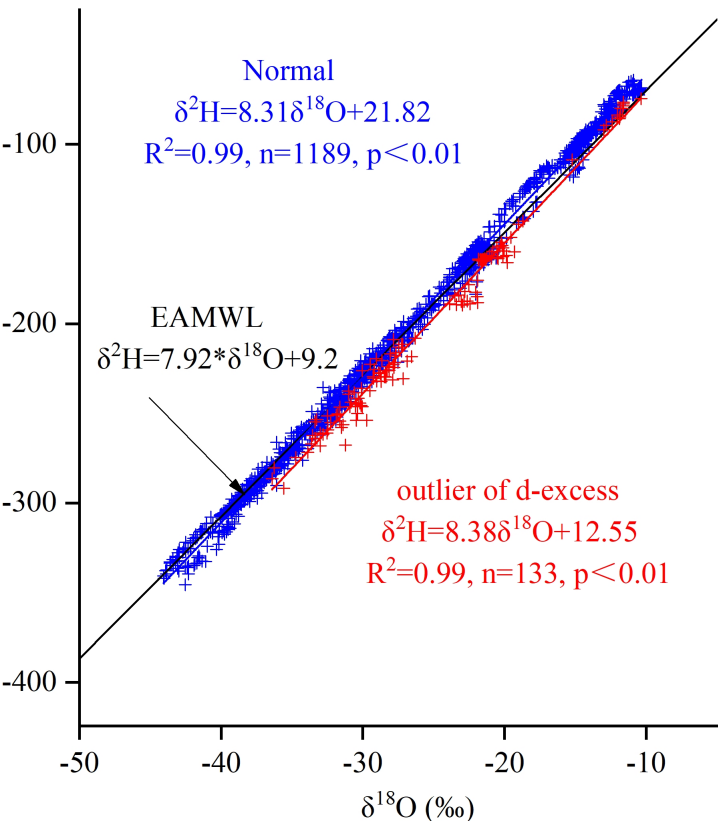

b) Monsoon period

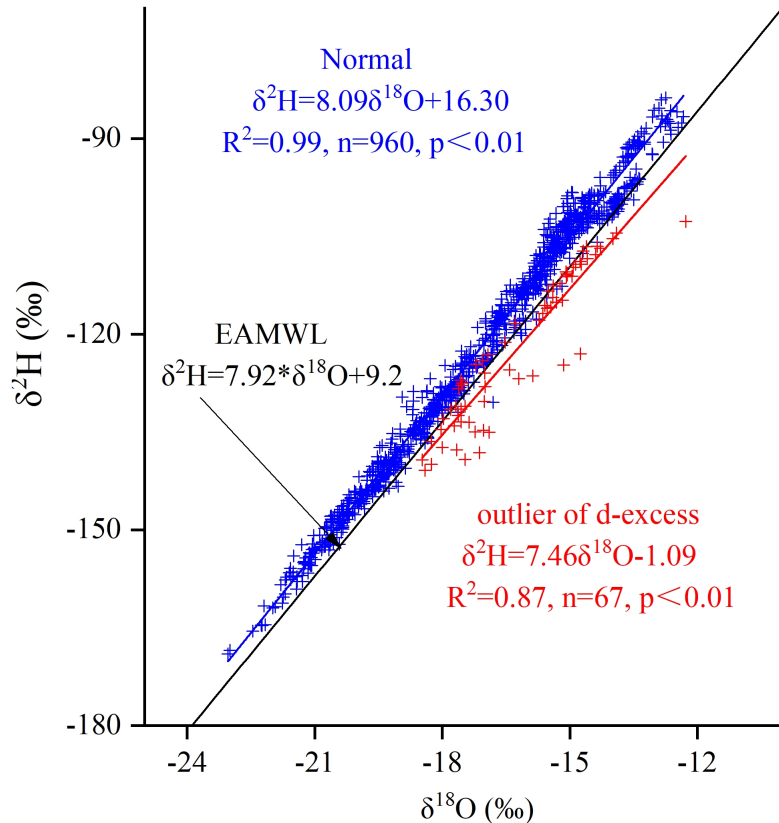

Supplement: Supplementary file 1 [file acp-2022-223-supplement.zip › Fig.S6.pdf]

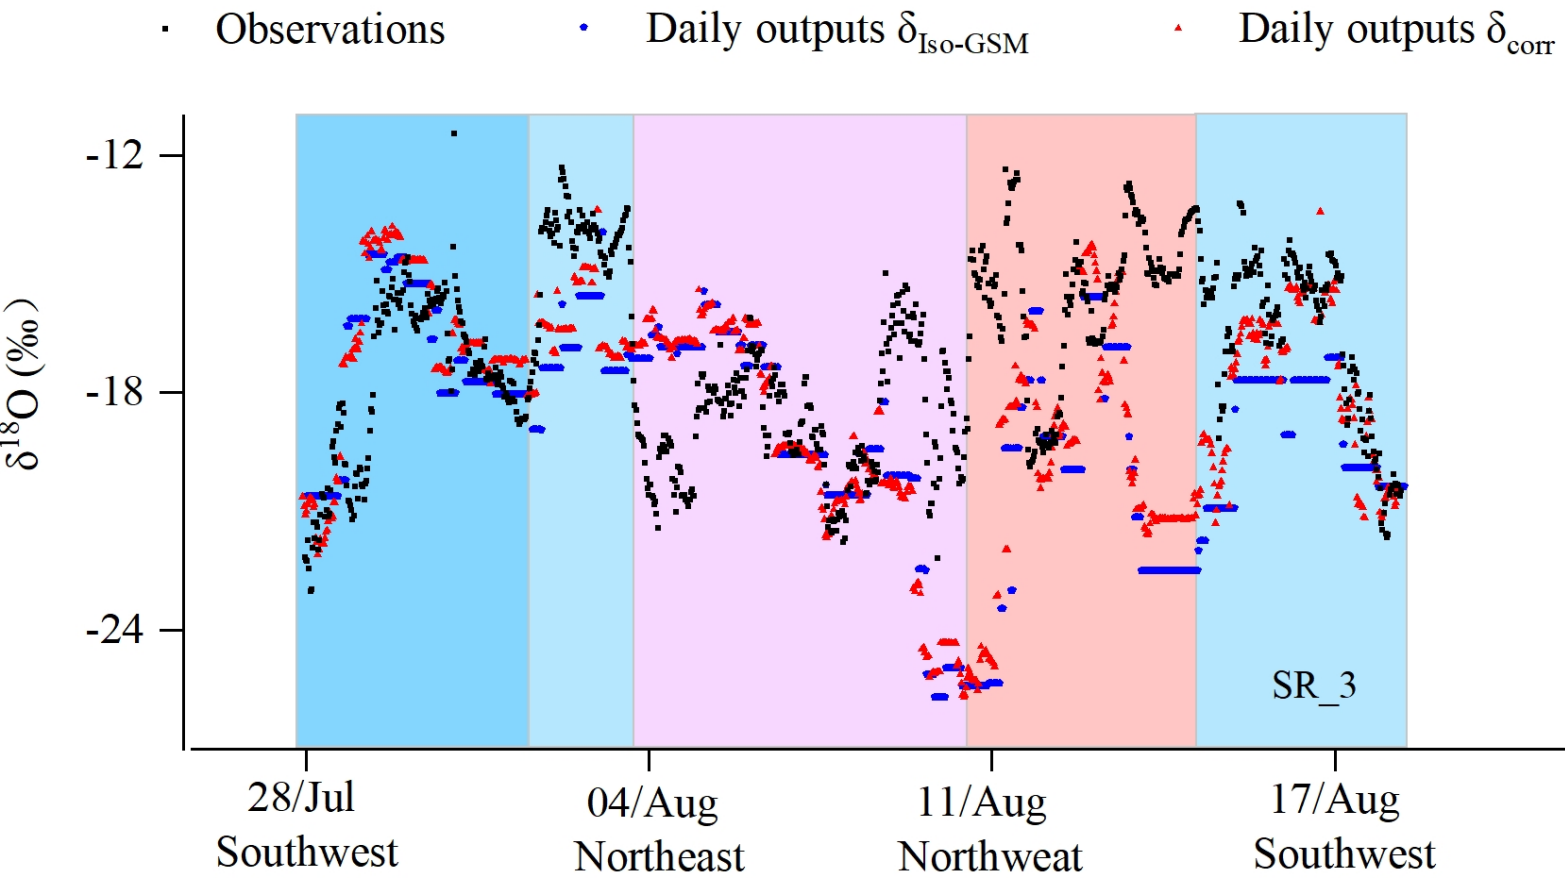

Supplement: Supplementary file 1 [file acp-2022-223-supplement.zip › Fig.SIII-1.pdf]
